# Supplementary material for: Renin-Angiotensin System in Lung Tumor and Microenvironment Interactions
Source: PubMed Central journal article supplement (PMC7352181; doi:10.3390/cancers12061457), 2020-06-03
Supplement: cancers-12-01457-s001.pdf [file cancers-12-01457-s001.pdf]

## Supplementary Materials

# Renin–Angiotensin System in Lung Tumour and Microenvironment Interactions

Maria Joana Catarata, Ricardo Ribeiro, Maria José Oliveira, Carlos Robalo Cordeiro and Rui Medeiros

**Table S1.** Clinical Trials of renin angiotensin blockers and its role in lung cancer and pulmonary fibrosis. (adapted from clinicaltrials.gov).

| Identifier  | Condition                                                                                                                                                                                   | Design                                | Intervention                                                   | Primary Endpoint                                                                                   | Status     |
|-------------|---------------------------------------------------------------------------------------------------------------------------------------------------------------------------------------------|---------------------------------------|----------------------------------------------------------------|----------------------------------------------------------------------------------------------------|------------|
| NCT00077064 | Captopril in treating patients with non-small cell lung cancer or limited-stage small cell lung cancer that has been previously treated with radiation therapy with or without chemotherapy | Phase II Randomized Trial             | Captopril or placebo                                           | Incidence of pulmonary damage after radiotherapy                                                   | Terminated |
| NCT01880528 | Lisinopril in reducing shortness of breath caused by radiation therapy in patients with lung cancer                                                                                         | Double-Blind Randomized               | Lisinopril or placebo                                          | Incidence of grade 3 or higher hypotension, acute kidney injury, allergic reaction, or anaphylaxis | Completed  |
| NCT01754909 | Mitigation of radiation pneumonitis and fibrosis                                                                                                                                            | Phase II Randomized Trial             | Enalapril or placebo                                           | Occurrence and grade of radiation pneumonitis                                                      | Completed  |
| NCT00879879 | Losartan in treating patients with idiopathic pulmonary fibrosis                                                                                                                            | Multicenter Clinical Trial            | Losartan                                                       | Stable or improved forced vital capacity (FVC) response at 1 year in idiopathic pulmonary fibrosis | Completed  |
| NCT00471562 | Angiotensin-(1–7) in treating patients with metastatic or unresectable solid tumors                                                                                                         | Phase I Non-Randomized Clinical Trial | Angiotensin-(1–7) sequentially increasing doses 50–1000 mcg/kg | Maximum tolerated dose and toxicity                                                                | Completed  |
| NCT00886353 | Safety and tolerability study of APN01 (recombinant human angiotensin converting enzyme 2)                                                                                                  | Phase II Randomized Trial             | APN01 i.v. or placebo                                          | Safety and tolerability profile of APN01                                                           | Completed  |
| NCT00880386 | Losartan in treating pulmonary fibrosis in patients with Stage I, II, or III Non-Small Cell Lung Cancer                                                                                     | Multicenter Clinical Trial            | Losartan and radiotherapy                                      | Change in carbon monoxide diffusing capacity (DLCO) at 6 months                                    | Withdrawn  |

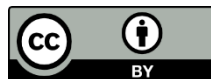

© 2020 by the authors. Licensee MDPI, Basel, Switzerland. This article is an open access article distributed under the terms and conditions of the Creative Commons Attribution (CC BY) license (<http://creativecommons.org/licenses/by/4.0/>).
